# Supplementary material
Source: publisher figshare collection journal article supplement (https://rs.figshare.com/ndownloader/files/14652434)
Supplement: Supplementary file 1 [file 14652434]

# How does mobility help distributed systems compute? supplemental material

William Vining, Fernando Esponda, Melanie Moses, Stephanie Forrest

January 29, 2019

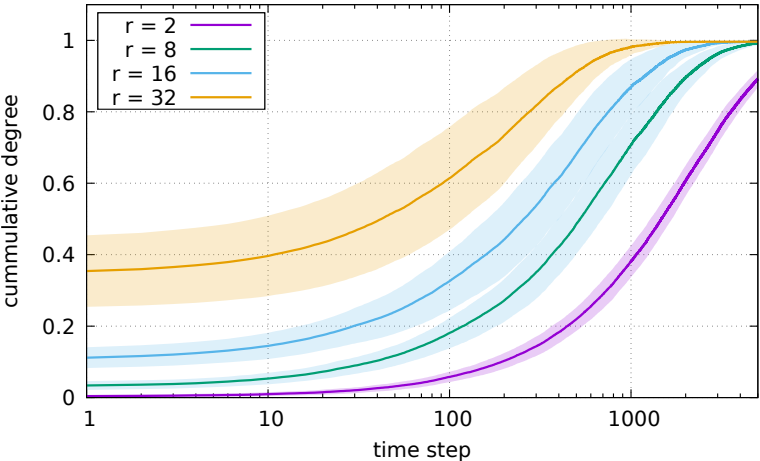

Figure 1: Average cumulative degree of agents moving with a correlated random walk ( $\sigma = \pi/4$ ,  $s = 1$ ,  $N = 255$ ,  $L = 80$ ). By moving straighter agents can achieve much the same effect as moving faster with an uncorrelated random walk.

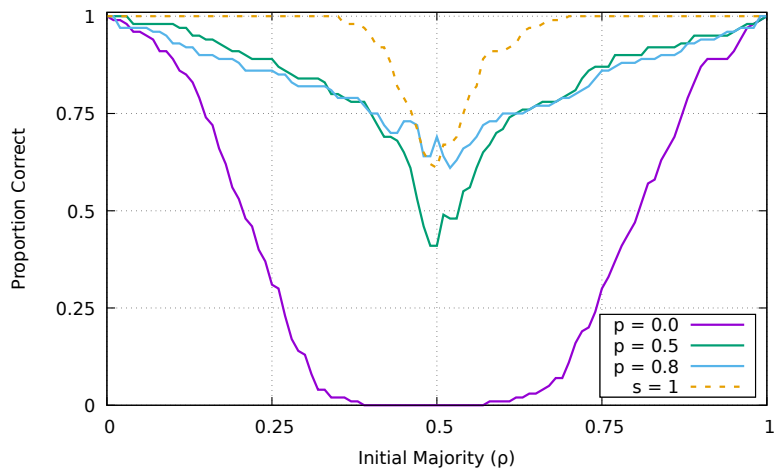

Figure 2: Performance of “small-world” random geometric graphs with no mobility. The solid curves show classification performance for a  $N = 255$  agents with  $r = 8$ ,  $L = 80$  and  $s = 0$  where every edge in the communication network has probability  $p$  of being replaced by a random edge (this is comparable the “rewiring” model for building a small world network from [1]). The dashed curve shows the performance of the same set of model parameters but with speed  $s = 1$ . Classification performance is considerably better with movement than with random long distance links for almost all initial conditions.

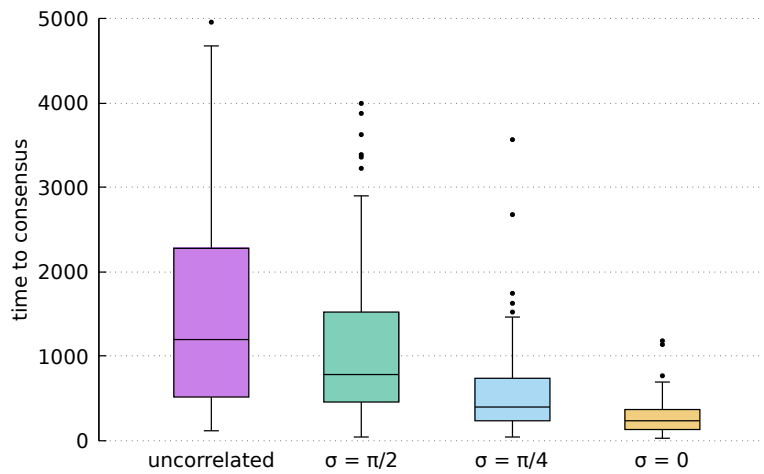

Figure 3: Time to reach consensus for a correlated random walk. At each time step agents select a new heading from a normal distribution with mean equal to their current heading and standard deviation  $\sigma$ . As agents walks become more correlated (lower  $\sigma$ ) the average time to reach consensus decreases with a minimum reached when agents move under ballistic motion, only turning when they reflect off the arena boundaries.

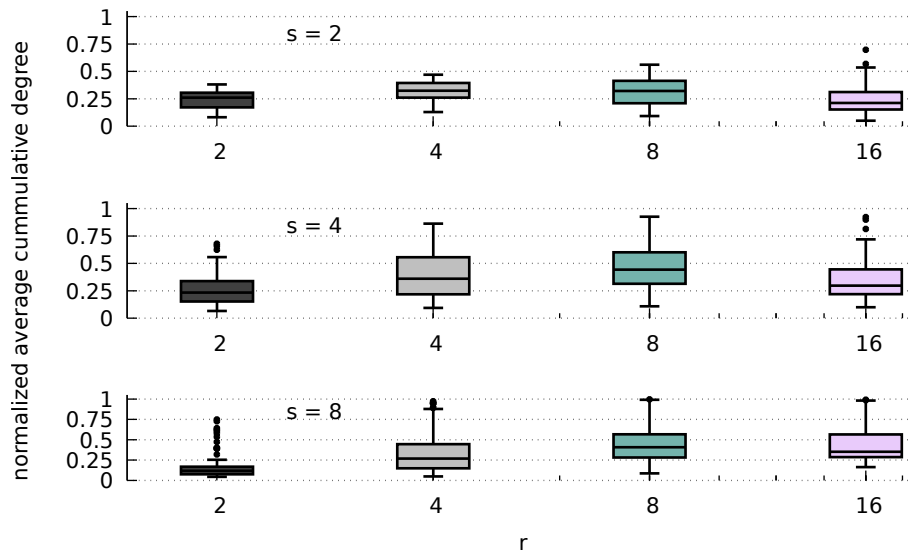

Figure 4: Median normalized cumulative degree for  $N = 1023$  agents in an arena with size  $L = 160$  at the time consensus is reached. Each box represents 100 random trials with the given  $r$  and  $s$ . Only those trials that reached consensus in  $T = 5000$  time steps are included.

## References

- [1] D. J. Watts and S. H. Strogatz. Collective dynamics of “small world” networks. *Nature*, 393(6684), 1998.
